# Supplementary material for: Seamless seasonal to multi-annual predictions of temperature and standardized precipitation index by constraining transient climate model simulations
Source: Copernicus journal article supplement (doi:10.5194/egusphere-2025-319), 2025-02-10
Supplement: Supplementary file [file egusphere-2025-319-AC2-supplement.pdf]

## Comments Reviewer 2

In the manuscript entitled “*Seamless seasonal to multi-annual predictions of temperature and standardized precipitation index by constraining transient climate model simulations*”, Acosta Navarro and colleagues used an analog method to provide seamless climate forecasts of temperature and SPI across seasonal to multiannual timescales. This method has the advantage of providing forecasts that are not impacted by initialization shocks or drift and that can easily be updated monthly. I found that the method proposed by the authors, as well as the evaluation carried out, is interesting and will be of interest to the readers of the journal. However, I have some major and minor issues and comments that I hope are constructive, especially regarding the way the skill of the analog method is presented, as well as some methodological aspects.

### Abstract:

I.17-18: Although the analog method generally provides better skill than the unconstrained CMIP6 ensemble mean, this is not always the case, with some regions consistently showing non-significant improvements. For example, this applies to large parts of the Northern Hemisphere continent in the seasonal prediction of surface temperature (Figs. 1 and 2e). For multiannual prediction, we can clearly see some regions where the analog method is less skillful than the unconstrained CMIP6 ensemble (Figs. 7 and 8e). Therefore, I believe the statement 'consistently outperforming the unconstrained CMIP6 ensemble' is somewhat biased and should be more nuanced.

This is a fair point, the text of the abstract was changed to “The analog method yields predictive skill for surface air temperature forecasts across timescales, ranging from seasons to several years. On average, the analog-based surface air temperature predictions provide added value over ~~consistently outperforming the unconstrained CMIP6 ensemble~~, especially on seasonal to annual timescales.”

I.20-22: The skill of the analog method is generally lower than that of seasonal prediction (e.g., Fig. 4). For multiannual prediction, the results are more mixed: the analog method appears to be slightly more effective than the EC-Earth3 prediction system for 12- and 24-month predictions but clearly shows lower skill at 48-month predictions (e.g., Fig. 11). Therefore, I believe the statement 'competitive compared to state-of-the-art initialized climate prediction systems' should again be more nuanced, emphasizing the method's potential at annual to biennial timescales, where it seems more competitive with state-of-the-art initialized climate prediction systems. Additionally, this does not detract from the fact that this method could be a highly useful tool for seamless predictions.

Reviewer 1 had a very similar comment, and we use the same response here:

This is a fair point, the text of the abstract (ln. 20-22) was changed to “The analog-based seamless prediction system ~~is shows very similar patterns of skill~~ competitive compared to state-of-the art initialised climate prediction ~~systems~~ systems and has competitive skill- with

initialized numerical prediction systems on annual and biennial forecast ranges. ~~that currently provide forecasts for specific time scales, such as seasonal and multi-annual.~~ ”

Method:

I.93: How was the 1960–2030 period chosen? What is the added value of selecting analogs over a near-future period (i.e., selecting analogs from 2030 onward for a 2024 forecast, if I understand the method correctly)?

The period was chosen to be representative of the hindcast period 1962-2018, but also with the aim of keeping the future period in the method for performing actual forecasts. We think it is important that the near-future period is included in case unprecedented conditions happen in an operational context. For example the year 2024 was exceptional and most likely better represented by future CMIP6 conditions. The following sentence was added to clarify this point: “The period 1960-2030 was chosen to include a climatically representative period of the hindcast with an extension to the future to allow for the occurrence of unprecedented climatic states in a real-time forecasting context.”

Table S4-5: Why use 4-month tests instead of 3-month tests, as in the other table, for the 24-month prediction?

This was a typo and we did it for 3 months instead of 4 to be consistent with 3- and 24-month predictions. it was corrected in the tables S4-S5.

I.105-106: Why the period used is smaller for longer prediction ?

This is simply limited by the data available between 1960-2030. For 4 year predictions, 4 year averages need to be made limiting the actual period on both ends. This is explained in the methodology section with an example in line 111.

I.114: I am a bit confused about Method 3. I understand that the authors aim to maintain a similar ensemble size while maximizing the number of models, but I am unsure how to interpret the results, especially in cases where the same member is chosen for the majority of the five analogs.

This was indeed the case only for models that had less than 10 members available. In those cases the same analog was repeated to guarantee an identical ensemble size for each model. This essentially means that the weight of those ensembles of models were increased. In any case the results seem very insensitive to the method chosen, yielding very similar overall results regardless of the method selected. We have modified the I. 116 to expand and clarify better this point:

Method 3: Ten members from each model. For models that provide fewer than 10 members, the members are used more than once to complete a set of 10 for each model, 190 members in total. Essentially increasing the relative weight of the analogs of models with fewer than 10 members.

I.119-123: The method used to remove the trend may need further clarification. Are you referring to removing a linear trend from the analog-method predictions and observations (this is not specified), as indicated in Figure 5 of Smith et al. (2019) ? If so, the potential implications should be clarified, as this approach may not effectively remove the forced signal compared to using the ensemble mean for each model. Additionally, the implications of this methodological choice—where all members will have the same trend—should be discussed further.

Same reply used in one of the comments from Reviewer 1:

We only performed a skill assessment of the ensemble mean of the analog-based predictions. For that reason removing the forced signal (CMIP6 ensemble mean) from the ensemble mean of the analog predictions is valid. The trend adjustment is one of the necessary steps of the analog-based method due to the fact that analogs can be selected from any year in the period 1960-2030 and do not necessarily have the right forcing state. The trend adjustment guarantees that this erroneous forcing is corrected to actually represent the correct forcing of the year(s) of the predictions. The analog-method before applying the trend correction was not designed to capture the forced response. To make this point clear we have modified sentences 121-125: “This step is done because ~~the observed trend is better represented in the CMIP6 ensemble than in the analog-based predictions without post-processing~~; the analogs can be selected from any year in the period 1960-2030 and do not necessarily have the right forcing state. The trend adjustment guarantees that this erroneous forcing is corrected to represent the forcing of the year(s) of the predictions“

121-122: Does this mean that the analog-based method failed to capture the forced response in surface temperature ?

Please see the previous response. Although the analog-method captures trends, it underestimates them due to the nature of the methodology that selects analogs from different forcing states. The trend adjustment is a necessary step in the generation of TAS predictions.

I.137-138: I am a bit confused here. For surface temperature predictions, you removed the external forcing, added the CMIP6 ensemble mean, and then used linear regression at each grid point to remove the CMIP6 ensemble mean in order to estimate internal variability. Why not directly estimate internal variability as the residual after removing the external forcing, before adding the CMIP6 ensemble mean?

It seems like there is likely a misunderstanding, we actually did exactly as the reviewer suggests. We have modified the text as follows: “Using the best overall method from the sensitivity tests (method 4), the selected analogs then constitute the forecasts and can be interpreted as ensemble members. Additionally, the trend ~~of~~ ~~in~~ the ensemble-mean TAS

analog-based predictions is adjusted by first removing the signal explained by external forcing as in Smith et al., (2019) and then adding ~~back~~ the externally forced trend (i.e. the CMIP6 ensemble mean) ~~to those residuals~~. To make this point clear we have modified sentences 132-136: “This is necessary because ~~the observed trend is better represented in the CMIP6 ensemble than in the analog-based predictions without post-processing~~; the analogs can be selected from any year in the period 1960-2030 and do not necessarily have the right forcing state. The trend adjustment ensures that potential offsets related to selecting analogs from other forcing states are corrected to represent the forcing of the year(s) of the predictions. ”

We additionally deleted the sentence in the paragraph below causing confusion: “~~This is achieved by removing through linear regression and at the gridpoint level, the CMIP6 ensemble mean from the analog-based predictions and observations, respectively.~~”

I158: Why did you choose the EC-Earth3 prediction system, given that several centers now provide such predictions? It would be interesting to see whether the regions where the analog method performs better or worse than the EC-Earth3 prediction system remain the same for another prediction system. Additionally, I’m curious whether there is any known bias in the EC-Earth3 predictions that the analog-based method might improve.

Reviewer 1 had a very similar comment, and we include here part of that earlier response::

The scope of the study was to show that the method has a comparable skill to an operational forecasting system. We added the following sentence in lines in the summary and conclusions section and the figure below shows skill maps for TAS and precipitation for 12 and 60 month predictions. From the maps below (Figs. R6-R7) and the study from Delgado-Torres et al., (2022), it is clear that the skill patterns of the analog methods and the prediction systems share many similarities, including EC-Earth3. Looking into the particularities of a reference system was beyond the scope of the paper. The following lines were added in the summary and conclusions’ section: “~~We have chosen EC-Earth3 as representative model of the typical decadal prediction system. It is possible that other decadal prediction systems perform better in particular regions and timescales, but EC-Earth3 forecasts quality metrics reveal it to be a good representative of these systems. For a thorough evaluation of several decadal prediction systems including EC-Earth, the reader is referred to Delgado-Torres et al., (2022).~~ ”

New reference:

[Delgado-Torres, C., Donat, M. G., Gonzalez-Reviriego, N., Caron, L., Athanasiadis, P. J., Bretonnière, P., Dunstone, N. J., Ho, A., Nicoli, D., Pankatz, K., Paxian, A., Pérez-Zanón, N., Cabré, M. S., Solaraju-Murali, B., Soret, A., & Doblas-Reyes, F. J.: Multi-Model Forecast Quality Assessment of CMIP6 Decadal Predictions. \*Journal of Climate\*, 35\(13\), 4363-4382, <https://doi.org/10.1175/JCLI-D-21-0811.1>, 2022.](https://doi.org/10.1175/JCLI-D-21-0811.1)

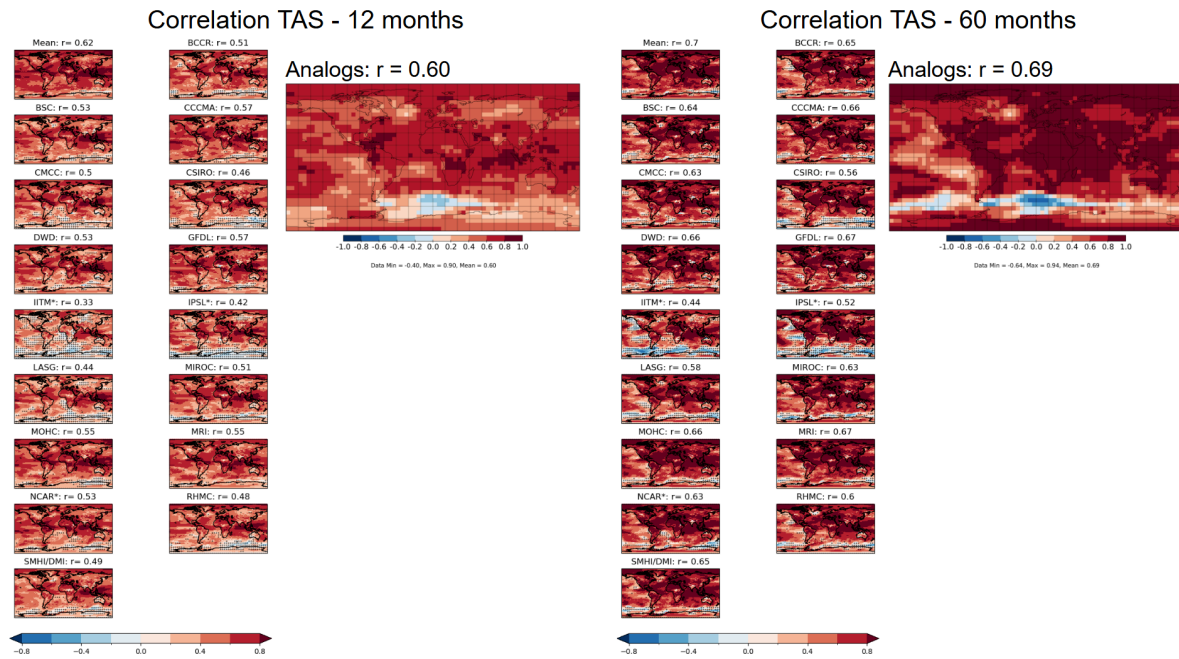

Figure R6: Anomaly correlation between different decadal prediction systems and observations contributing to the WMO decadal predictions for 12-month (left) and 60-month TAS predictions (right). The decadal multi-model and the 149-member analog-based skill maps are shown on the top left and right, respectively.

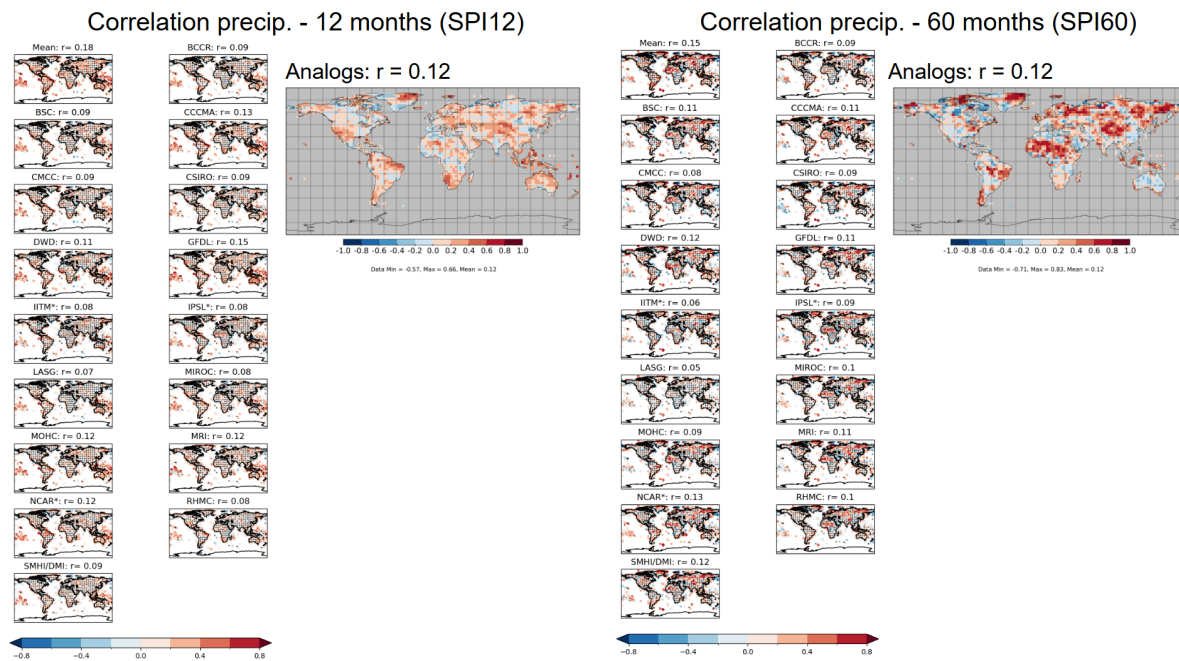

Figure R7: The same as Fig. R5, but for precipitation (decadal prediction systems) and SPI12 and 60, for the analog-based predictions.

Results:

I.175-178: Although the spatial pattern between the analog method and the prediction system is quite similar, the prediction system seems to have an overall larger correlation. A map of the difference between both would help clarify this, perhaps instead of Fig. 1c? This also seems to be the case for Fig. 2.

Same reply used in one of the comments from Reviewer 1:

The figure below (Fig. R2) displays the difference in ACC between the analog-based predictions and SEAS51 for DJF and JJA forecasts of TAS and SPI3. Note that panel f in Figs. 1-2 already displays the direct comparison between the analog-based and the SEAS51 predictions with a dedicated discussion and it is comparable with the differences in ACC shown below. We therefore feel that showing the differences in correlation are not necessary as we think keeping the panel c in these figures is important, because it shows the similarity of the skill patterns.

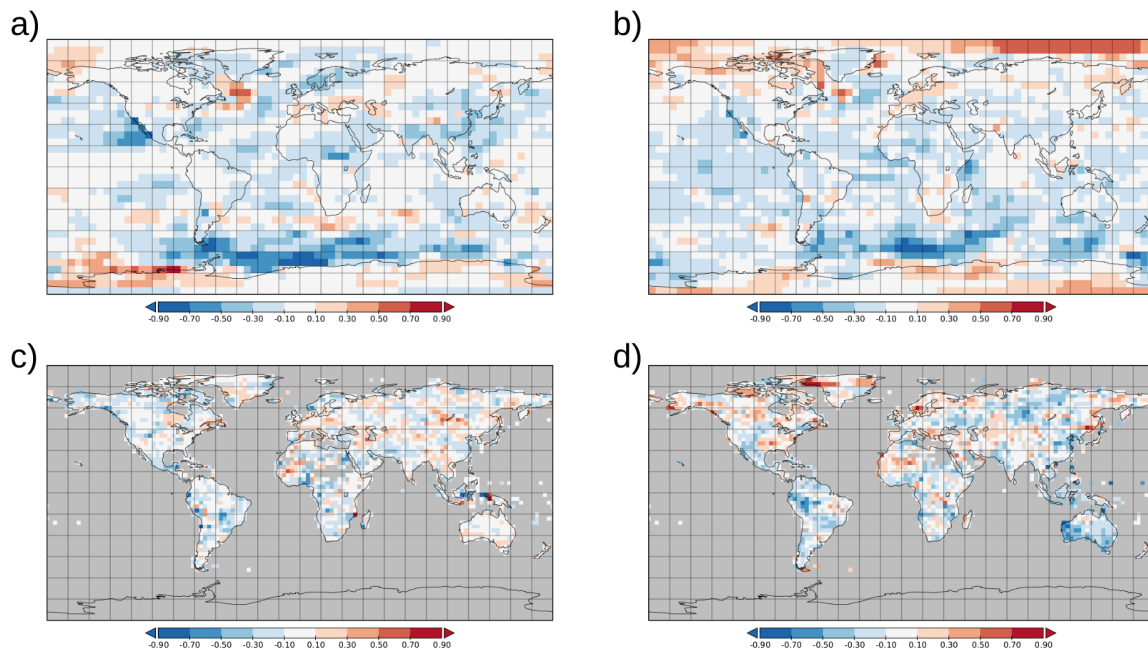

*Figure R2: Difference in TAS skill (anomaly correlation coefficients) between analog-based ensemble mean predictions and SEAS5 in a) December-February and b) June-August. Panels c) and d), show the same as a) and b), respectively, but for SPI3.*

I.215: “in which the skill seems to result from the external forcing.” It would be nice to add some reference to support this point.

The following reference was added to the manuscript.



[Ndiaye, C. D., Mohino, E., Mignot, J., & Sall, S. M.: On the Detection of Externally Forced Decadal Modulations of the Sahel Rainfall over the Whole Twentieth Century in the CMIP6 Ensemble, Journal of Climate, 35\(21\), 6939-6954, https://doi.org/10.1175/JCLI-D-21-0585.1, 2022](https://doi.org/10.1175/JCLI-D-21-0585.1)

I.230: I would not say that the skill is 'comparable' for TAS, as there are some seasons for which the SEAS51 predictions have a global land fraction significantly more correlated with the observations, with values more than 10% higher than those for the analog method.

Thank you for raising this fair point. The whole section has been changed due to concerns from both reviewers related to this particular point. The passage now reads: “~~Despite the~~~~The 3-month SPI3 analog-based predictions being generally less skillful than SEAS51 throughout most of the year, their~~ skill is comparable to SEAS51 predictions during between boreal fall and winter for both and TAS spring and SPI3 in terms of land area with positive and statistically significant residual correlation (Fig. 4).”, while the analog-based predictions of 3-month TAS are generally less skillful than SEAS51 throughout the year. ~~Although the largest contribution to the skill from the forced signal happens during boreal fall for TAS and SPI3,~~ skill over land peaks around boreal summer/fall and fall/winter for TAS and SPI3, respectively in both analog and SEAS51 predictions. This difference between the two variables can most likely be attributed to a more dominant influence of external forcing on TAS predictability, while for SPI3 the primary driver is natural variability. “

I.271: Are you talking about model bias that influence the analog-method or bias in the analog-method results ? If it is the first one, references would be welcome here.

Biases in the analog method, now it is specified in the text.

I.272: As for Fig 1 and 2, it would be nice to see the map of the difference.

Same reply used in one of the comments from Reviewer 1:

The figure below (Fig. R1) displays the difference in ACC between the analog-based predictions and SEAS51 for DJF and JJA forecasts of TAS and SPI3. Note that panel f in Figs. 1-2 already displays the direct comparison between the analog-based and the SEAS51 predictions with a dedicated discussion and it is comparable with the differences in ACC shown below. We therefore feel that showing the differences in correlation are not necessary as we think keeping the panel c in these figures is important, because it shows the similarity of the skill patterns.

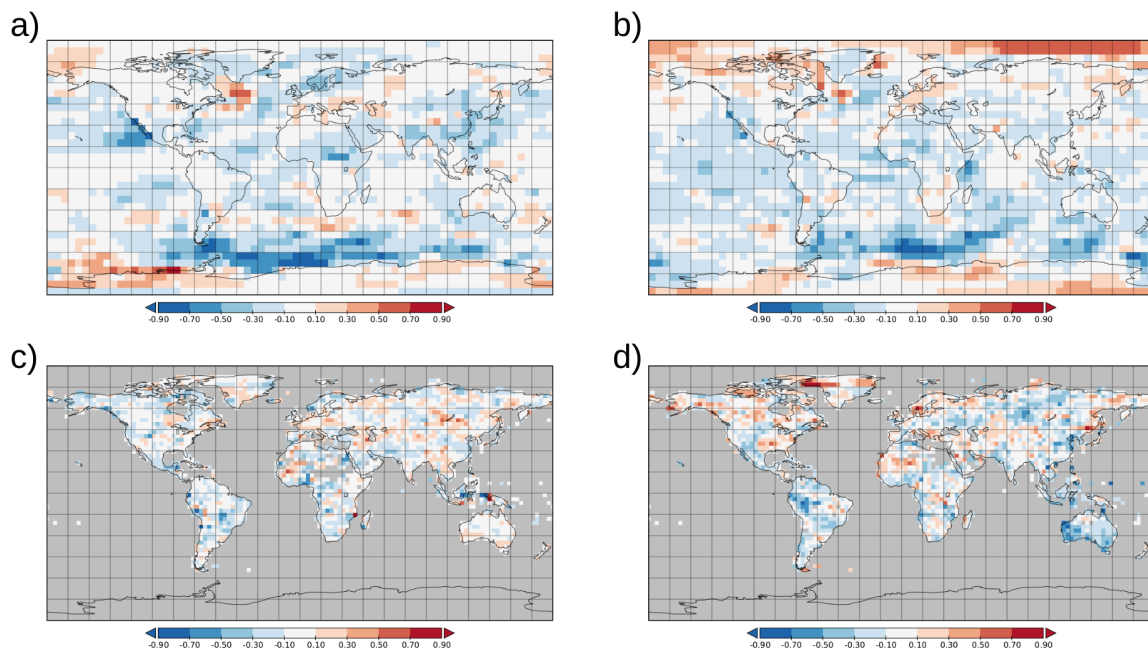

*Figure R1: Difference in TAS skill (anomaly correlation coefficients) between analog-based ensemble mean predictions and SEAS5 in a) December-February and b) June-August. Panels c) and d), show the same as a) and b), respectively, but for SPI3.*

Fig 11: It is interesting to see that the analog-based method is very close to EC-Earth3, or even slightly better, in terms of the fraction of global land area that is statistically significant with the observations for 12- and 24-month predictions of residual temperature and SPI. However, for 48-month predictions, the EC-Earth3 prediction system appears to be better. Do you have any thoughts on why the analog-based method might perform worse than the EC-Earth3 prediction system for long-term predictions?

We think that perhaps a longer period of SSTs constraints that define the analogs can play an important role at longer times. In this study we calculated the analogs based on SST average anomalies over one month, which was found optimal for the seamless seasonal to inter-annual time scale of predictions. However, for longer multi-annual to decadal prediction time scales, SST averages over longer periods (e.g. a few years) were found to be optimal for the analog definition e.g. by Mahmood et al. 2022 and Donat et al. 2024. The methods already contain some discussion related to this as well as the sensitivity tests available in the Supplementary material. The sentence was modified as: “Additional sensitivity tests also reveal that the optimal length (m and k) of SST pattern comparison is one month, independent of the different forecast ranges considered, -in particular for seasonal to inter-annual predictions (Tables S2-S7). ~~As opposed to our findings, Mahmood et al (2022) and Donat et al. (2024) found that for decadal to multi-decadal predictions which are more affected by low frequency variability, a constraining based on averages over several years provided the most skillful predictions.~~ Please note that for longer (e.g. multi-annual to multi-decadal) forecast times analogs based on longer-term SST averages were determined to give highest skill (e.g. Mahmood et al. 2022, Donat et al. 2024). The



time scales of the analogs represent processes relevant for the predictions. While for seasonal to inter-annual predictions SST variations at higher frequency (e.g. ENSO) are most relevant, for longer prediction horizons (also reaching beyond the ENSO predictability barrier) other lower-frequency variations (e.g. Atlantic Multidecadal Variability) are more relevant. “

I.366-367: I think this needs a bit more clarification here or in the Fig. 11 legend to make it easier for the reader to follow the analysis. In Fig. 11, if I understand correctly, the months correspond to the predictions for each month relative to the forecast time. For example, June for TAS 12-months corresponds to the temperature prediction for the first month of June in the forecast, and June for TAS 24-months corresponds to the temperature prediction for the second month of June in the forecast, with the prediction starting in November. Does the light green line represent the same thing, but starting in May instead of November? In that case, we can expect this result, as the prediction time is shorter for the light green curve.

The forecast ranges evaluated are always 12, 24 and 48 months for panels a,d, b,e and c,f, respectively. The month in the x-axis indicates the first month of each one of those periods of evaluation. For example, in Fig. 11a, the value of March, means that the predictions were evaluated between March and the following February. The lead time increases for EC-Earth3 and analogs, since they are initialized each November, while the analogs-1 month lead is always initialized the month before the first month of evaluation, in this example, each February.

The following sentence was added in the end of the caption of the Figure: The x-axis always shows the first month of the forecasted period evaluated. For example, in panels b,e the values of August indicate the skill for predictions between August in the first forecast year and July two years later.

Note also that due to the previous comments related to the trend removal, Fig. 11 has been slightly modified (See 4th comment from Reviewer 1) to account for the removal of trends using their own model trend. For example, EC-Earth3 residual skill is estimated by removing only the forced signal from EC-Earth3 uninitialized simulations, while the 25-member analog-based predictions use the same 25 members from the uninitialized ensemble to compute the residual skill. The conclusions remain qualitatively the same.

I.375-376: Same comments as for the abstract.

These sentences have been changed due to concerns from both reviewers, now it reads:

~~“The analog-based predictions demonstrate skill on seasonal to multi-annual time scales, in many cases comparable to state-of-the-art numerical prediction systems developed for either seasonal or decadal climate predictions. The analog-based predictions provide skilful forecasts on seasonal to multi-annual time scales and show in general similar spatial patterns of skill to initialized numerical predictions. Furthermore, the analog-based~~

predictions are competitive with existing annual and multi-annual predictions from initialized numerical predictions. ”

I.403-405: This is a strong added value of the analog method, I think it should be emphasized more

Sentence in L444 has been modified to highlight more this advantage: “This methodology offers a complementary source of climate information to existing seasonal and decadal climate predictions, filling an existing gap across timescales and doing so in a seamless manner.”

I.408-416: I would just add a point to remind that the analog-method does not induce any drift due to the shock of the initialization, which is also an important added value of the method.

The sentence in line 441 has been changed to mention this: “Despite some potential limitations related to the lack of a more sophisticated model initialization, ~~Th~~these analog-based forecasts have no initialization shock nor drift, and are competitive with the existing prediction systems on annual to multi-annual forecast ranges. ”

Small correction:

I.99: The reference is not complete

Corrected.

I265-266: “The residual correlation of the analog forecasts is illustrated in Figure 6b.” → This information is already in the legend, so I'm not sure how useful it is here.

Good point, the sentence was deleted.

I302: I think it is Fig 8 instead of Fig 9

It has been corrected.
